# Supplementary material for: Theoretical insights into selective extraction of uranium from seawater with tetradentate N,O-mixed donor ligands
Source: Royal Society of Chemistry journal article supplement (doi:10.1039/d2dt01273a), 2022-01-01
Supplement: d2dt01273a1.pdf [file d2dt01273a1.pdf]

## Supporting Information

### Theoretical insights into selective extraction of uranium from seawater with tetradentate N,O-mixed donor ligands

*Xue-Fei Luan,<sup>a,b</sup> Cong-Zhi Wang,<sup>\*a</sup> Qun-Yan Wu,<sup>a</sup> Jian-Hui Lan,<sup>a</sup> Zhi-Fang Chai,<sup>a</sup> Liang-Shu Xia,<sup>\*b</sup> and Wei-Qun Shi<sup>\*a</sup>*

<sup>a</sup>Laboratory of Nuclear Energy Chemistry, Institute of High Energy Physics, Chinese Academy of Sciences, Beijing 100049, China

<sup>b</sup>School of Nuclear Science and Technology, University of South China, Hengyang 421001, Hunan Province, China

\*Email: shiwq@ihep.ac.cn; wangcongzhi@ihep.ac.cn; xls1966@hotmail.com;

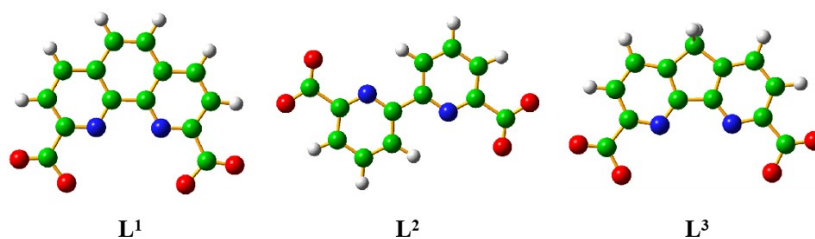

**Figure S1.** The optimized structures of the  $L^1$ ,  $L^2$  and  $L^3$  ligands in the gas phase by the B3LYP method. White, green, red and blue represent H, C, O and N, respectively.

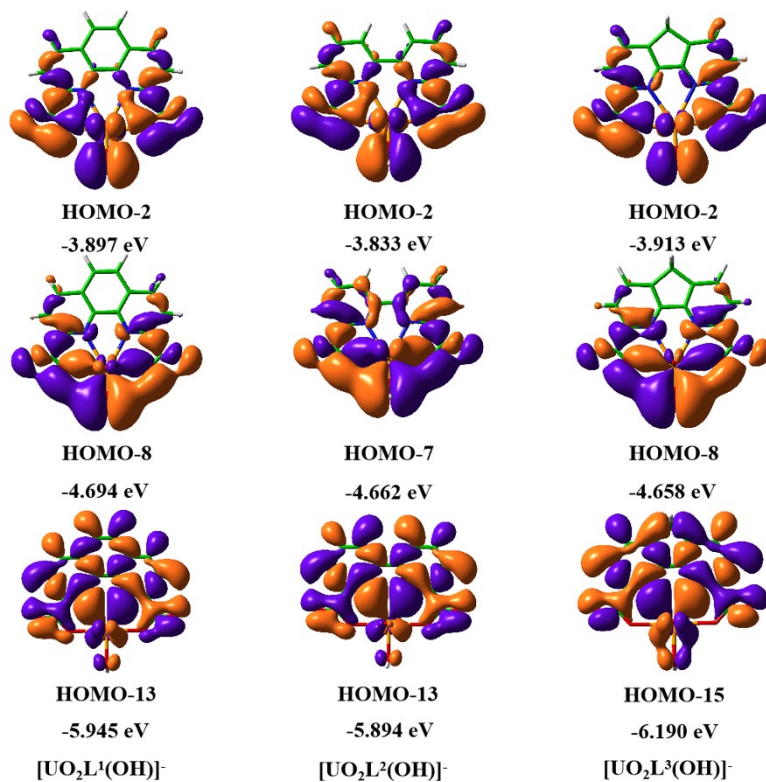

**Figure S2.** Main molecular orbitals (MOs) of the  $[\text{UO}_2\text{L}(\text{OH})]^-$  complexes supporting to the metal-ligand bonding by the B3LYP method (the isosurface value is set as 0.01 a.u.).

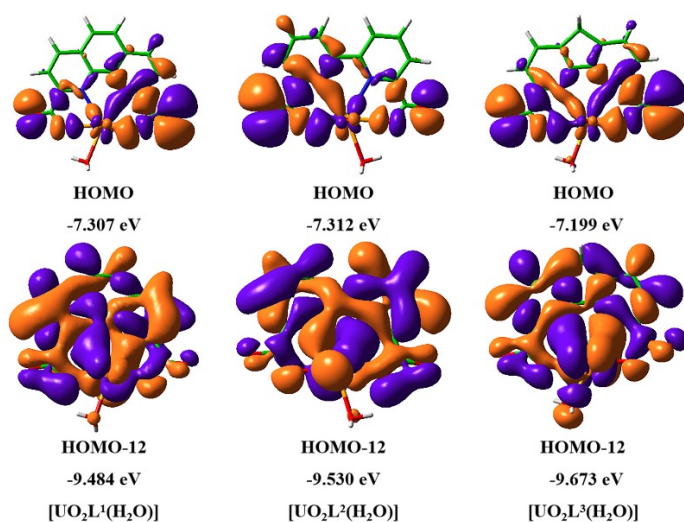

**Figure S3.** Main molecular orbitals (MOs) of the [UO<sub>2</sub>L(H<sub>2</sub>O)] complexes supporting to the metal-ligand bonding by the B3LYP method (the isosurface value is set as 0.01 a.u.).

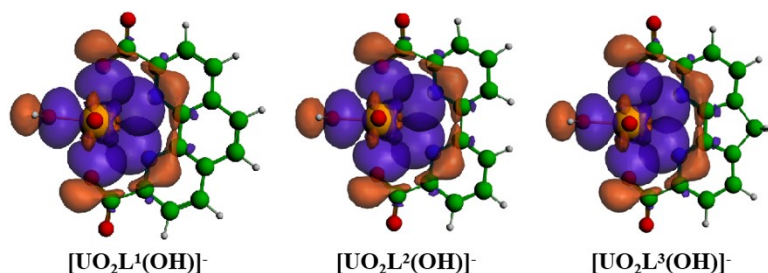

**Figure S4.** NBO orbitals of the U-N bonds and U-O bonds of the [UO<sub>2</sub>L(OH)]<sup>-</sup> complexes by the PBE/TZP/ZORA method (the isosurface value is set as 0.02 a.u.).

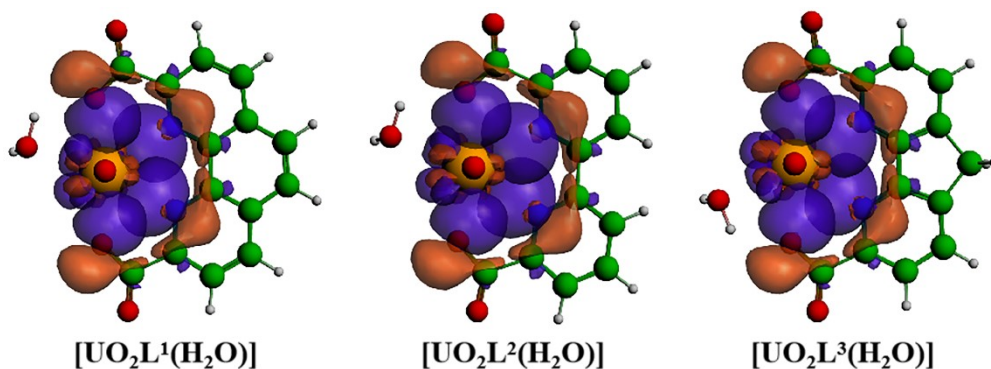

**Figure S5.** NBO orbitals of the U-N bonds and U-O bonds of the [UO<sub>2</sub>L(H<sub>2</sub>O)] complexes by the PBE/TZP/ZORA method (the isosurface value is set as 0.02 a.u.).

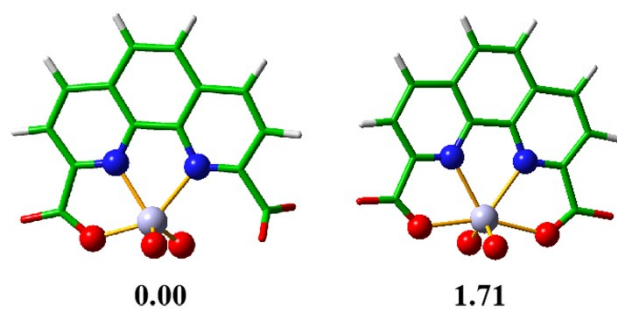

**Figure S6.** The isomers of  $[\text{VO}_2\text{L}^1]^-$  and relative energies (kcal/mol) by the B3LYP method.

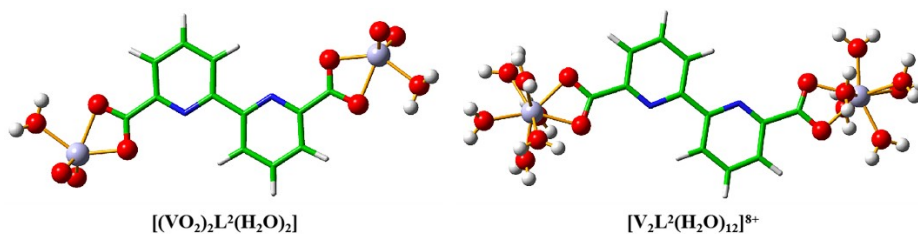

**Figure S7.** The optimized structures of the  $[(\text{VO}_2)_2\text{L}^2(\text{H}_2\text{O})_2]$  and  $[\text{V}_2\text{L}^2(\text{H}_2\text{O})_{12}]^{8+}$  complexes by the B3LYP method.

**Table S1.** Compositions of  $\sigma$ -Bonds about Metal-ligand Bonding on  $[\text{UO}_2\text{L}(\text{CO}_3)]^{2-}$  by the B3LYP Method.

| Species                                     | MO      | U    |      |      | N(L) | O(L)  | O(CO <sub>3</sub> <sup>2-</sup> ) |
|---------------------------------------------|---------|------|------|------|------|-------|-----------------------------------|
|                                             |         | 5f   | 6d   | 7s   | 2p   | 2p    | 2p                                |
| $[\text{UO}_2\text{L}^1(\text{CO}_3)]^{2-}$ | HOMO-4  | 1.22 | —    | —    | 1.58 | 5.02  | 1.49                              |
|                                             | HOMO-10 | 1.99 | —    | 1.50 | —    | 35.16 | 1.22                              |
| $[\text{UO}_2\text{L}^2(\text{CO}_3)]^{2-}$ | HOMO-4  | 1.09 | —    | —    | 2.05 | 4.33  | 1.86                              |
|                                             | HOMO-10 | 2.15 | —    | 1.58 | —    | 33.82 | 2.09                              |
| $[\text{UO}_2\text{L}^3(\text{CO}_3)]^{2-}$ | HOMO-4  | 2.38 | —    | —    | —    | 6.37  | 4.94                              |
|                                             | HOMO-8  | 1.32 | 1.54 | —    | —    | 37.16 | —                                 |

**Table S2.** Compositions of  $\sigma$ -Bonds about Metal-ligand Bonding on  $[\text{UO}_2\text{L}(\text{OH})]^-$  by the B3LYP Method.

| Species                                | MO      | U    |      |      | N(L) |       | O(L)  | O(OH <sup>-</sup> ) |
|----------------------------------------|---------|------|------|------|------|-------|-------|---------------------|
|                                        |         | 5f   | 6d   | 7p   | 2s   | 2p    | 2p    | 2p                  |
| $[\text{UO}_2\text{L}^1(\text{OH})]^-$ | HOMO-2  | 1.08 | —    | 1.91 | —    | —     | 34.88 | 42.81               |
|                                        | HOMO-8  | 5.56 | 7.33 | 1.16 | —    | —     | 31.47 | 42.31               |
|                                        | HOMO-13 | 1.57 | 3.01 | —    | 6.81 | 54.46 | —     | —                   |
| $[\text{UO}_2\text{L}^2(\text{OH})]^-$ | HOMO-2  | 1.35 | —    | 1.71 | —    | —     | 28.68 | 43.53               |
|                                        | HOMO-7  | 5.37 | 7.30 | 1.17 | —    | —     | 32.42 | 38.95               |
|                                        | HOMO-13 | 1.39 | 2.82 | —    | 7.24 | 57.00 | —     | —                   |
| $[\text{UO}_2\text{L}^3(\text{OH})]^-$ | HOMO-2  | —    | —    | 1.69 | —    | —     | 51.32 | 26.35               |
|                                        | HOMO-8  | 6.22 | 6.89 | 1.24 | —    | —     | 18.80 | 58.76               |
|                                        | HOMO-15 | 1.71 | 3.80 | —    | 7.32 | 52.1  | —     | —                   |

**Table S3.** Compositions of  $\sigma$ -Bonds about Metal-ligand Bonding on  $[\text{UO}_2\text{L}(\text{H}_2\text{O})]$  by the B3LYP Method.

| Species                                       | MO      | U    |      |      | N(L) |       | O(L) |
|-----------------------------------------------|---------|------|------|------|------|-------|------|
|                                               |         | 5f   | 6d   | 7p   | 2s   | 2p    | 2p   |
| $[\text{UO}_2\text{L}^1(\text{H}_2\text{O})]$ | HOMO    | 1.27 | —    | —    | —    | —     | 7.57 |
|                                               | HOMO-12 | 3.84 | 2.55 | 1.36 | 3.59 | 37.23 | 3.92 |
| $[\text{UO}_2\text{L}^2(\text{H}_2\text{O})]$ | HOMO    | 1.18 | —    | —    | —    | —     | 7.46 |
|                                               | HOMO-12 | 3.88 | 2.76 | 1.32 | 4.04 | 43.73 | 3.54 |
| $[\text{UO}_2\text{L}^3(\text{H}_2\text{O})]$ | HOMO    | 1.73 | —    | —    | —    | —     | 8.78 |
|                                               | HOMO-12 | 5.07 | 2.78 | 2.00 | 5.34 | 40.78 | 7.57 |

**Table S4.** Compositions of the U-O and U-N  $\sigma$ -Bonds in  $[\text{UO}_2\text{L}(\text{CO}_3)]^{2-}$  Complexes by the PBE/TZP/ZORA Method.

| Complexes                                   | Element                           | Composition (%) | Contributions of each atomic orbital (%) |
|---------------------------------------------|-----------------------------------|-----------------|------------------------------------------|
| $[\text{UO}_2\text{L}^1(\text{CO}_3)]^{2-}$ | U                                 | 5.67            | 7s(10.87) 6d(54.88) 5f(33.89)            |
|                                             | O(L)                              | 94.33           | 2s(18.71) 2p(81.22)                      |
|                                             | U                                 | 12.67           | 7s(25.63) 6d(31.87) 5f(42.40)            |
|                                             | O(CO <sub>3</sub> <sup>2-</sup> ) | 87.34           | 2s(20.82) 2p(79.05)                      |
| $[\text{UO}_2\text{L}^2(\text{CO}_3)]^{2-}$ | U                                 | 6.29            | 7s(10.29) 6d(55.71) 5f(33.91)            |
|                                             | O(L)                              | 93.72           | 2s(18.74) 2p(81.21)                      |
|                                             | U                                 | 12.86           | 7s(24.47) 6d(33.28) 5f(42.19)            |
|                                             | O(CO <sub>3</sub> <sup>2-</sup> ) | 87.14           | 2s(20.49) 2p(79.38)                      |
| $[\text{UO}_2\text{L}^3(\text{CO}_3)]^{2-}$ | U                                 | 4.91            | 7s(6.47) 6p(2.02) 6d(45.83) 5f(45.68)    |
|                                             | N(L)                              | 95.09           | 2s(27.01) 2p(72.90)                      |
|                                             | U                                 | 11.47           | 7s(20.35) 6p(1.25) 6d(36.62) 5f(41.78)   |
|                                             | O(CO <sub>3</sub> <sup>2-</sup> ) | 88.53           | 2s(20.60) 2p(79.26)                      |

**Table S5.** Compositions of the U-O and U-N  $\sigma$ -Bonds in  $[\text{UO}_2\text{L}(\text{OH})]^-$  Complexes by the PBE/TZP/ZORA Method.

| Complexes                              | Element             | Composition (%) | Contributions of each atomic orbital (%) |
|----------------------------------------|---------------------|-----------------|------------------------------------------|
| $[\text{UO}_2\text{L}^1(\text{OH})]^-$ | U                   | 7.52            | 7s(14.90)6p(1.90)6d(34.38)5f(48.83)      |
|                                        | O(L)                | 92.48           | 2s(21.97)2p(77.98)                       |
|                                        | U                   | 7.39            | 7s(22.89)6d(42.48)5f(34.23)              |
|                                        | N(L)                | 92.61           | 2s(28.34)2p(71.61)                       |
|                                        | U                   | 13.79           | 7s(6.23)6d(31.29)5f(62.43)               |
|                                        | O(OH <sup>-</sup> ) | 86.21           | 2s(36.25)2p(63.70)                       |
| $[\text{UO}_2\text{L}^2(\text{OH})]^-$ | U                   | 7.69            | 7s(15.32)6p(1.67)6d(34.29)5f(48.73)      |
|                                        | O(L)                | 92.31           | 2s(22.77)2p(77.17)                       |
|                                        | U                   | 7.24            | 7s(22.15)6d(42.64)5f(34.78)              |
|                                        | N(L)                | 92.76           | 2s(27.99)2p(71.95)                       |
|                                        | U                   | 13.84           | 7s(6.87)6d(30.79)5f(62.28)               |
|                                        | O(OH <sup>-</sup> ) | 86.16           | 2s(36.41)2p(63.54)                       |
| $[\text{UO}_2\text{L}^3(\text{OH})]^-$ | U                   | 6.95            | 7s(12.97)6p(2.91)6d(34.55)5f(49.57)      |
|                                        | O(L)                | 93.05           | 2s(19.15)2p(80.78)                       |
|                                        | U                   | 7.58            | 7s(25.73)6d(41.84)5f(32.01)              |
|                                        | N(L)                | 92.42           | 2s(28.94)2p(71.00)                       |
|                                        | U                   | 13.54           | 7s(4.16)6d(33.08)5f(62.72)               |
|                                        | O(OH <sup>-</sup> ) | 86.46           | 2s(35.94)2p(64.02)                       |

**Table S6.** Compositions of the U-O and U-N  $\sigma$ -Bonds in  $[\text{UO}_2\text{L}(\text{H}_2\text{O})]$  Complexes by the PBE/TZP/ZORA Method.

| Complexes                                     | Element | Composition (%) | Contributions of each atomic orbital (%) |
|-----------------------------------------------|---------|-----------------|------------------------------------------|
| $[\text{UO}_2\text{L}^1(\text{H}_2\text{O})]$ | U       | 11.30           | 7s(12.59)6d(43.86)5f(43.53)              |
|                                               | O(L)    | 88.70           | 2s(21.93)2p(78.03)                       |
|                                               | U       | 10.24           | 7s(28.52)6d(59.12)5f(12.30)              |
|                                               | N(L)    | 89.77           | 2s(29.58)2p(70.40)                       |
| $[\text{UO}_2\text{L}^2(\text{H}_2\text{O})]$ | U       | 11.40           | 7s(13.04)6d(43.30)5f(43.64)              |
|                                               | O(L)    | 88.60           | 2s(22.31)2p(77.64)                       |
|                                               | U       | 10.09           | 7s(28.44)6d(59.80)5f(11.68)              |
|                                               | N(L)    | 89.92           | 2s(29.46)2p(70.51)                       |
| $[\text{UO}_2\text{L}^3(\text{H}_2\text{O})]$ | U       | 11.03           | 7s(10.70)6d(45.13)5f(44.13)              |
|                                               | O(L)    | 88.98           | 2s(20.66)2p(79.30)                       |
|                                               | U       | 10.44           | 7s(28.02)6d(57.41)5f(14.50)              |
|                                               | N(L)    | 89.56           | 2s(30.05)2p(69.93)                       |

**Table S7.** V=O, V-O(L) and V-N(L) Average Bond Lengths ( $\text{\AA}$ ) of the  $[\text{VO}_2\text{L}]^-$  ( $\text{L}=\text{L}^1, \text{L}^2, \text{L}^3$ ) and  $[\text{VL}_2]^+$  Complexes by the B3LYP Method.

| Species                      | V=O   | V-O(L)   | V-N(L)       |
|------------------------------|-------|----------|--------------|
| $[\text{VO}_2\text{L}^1]^-$  | 1.592 | 2.017, — | 2.156, 2.251 |
| $[\text{VO}_2\text{L}^2]^-$  | 1.592 | 2.215    | 2.406        |
| $[\text{VO}_2\text{L}^3]^-$  | 1.588 | 2.025, — | 2.150, 2.580 |
| $[\text{V}(\text{L}^1)_2]^+$ | —     | 1.926    | 2.184        |
| $[\text{V}(\text{L}^2)_2]^+$ | —     | 1.908    | 2.205        |
| $[\text{V}(\text{L}^3)_2]^+$ | —     | 1.952    | 2.173        |



**Table S8.** Mayer Bond Orders (MBOs) of V=O, V-O(L) and V-N(L) Bonds by the PBE Method.

| Species                      | V=O   | V-O(L)   | V-N(L)       |
|------------------------------|-------|----------|--------------|
| $[\text{VO}_2\text{L}^1]^-$  | 1.907 | 0.438, — | 0.284, 0.342 |
| $[\text{VO}_2\text{L}^2]^-$  | 1.952 | 0.353    | 0.229        |
| $[\text{VO}_2\text{L}^3]^-$  | 1.930 | 0.443, — | 0.278, 0.263 |
| $[\text{V}(\text{L}^1)_2]^+$ | —     | 0.693    | 0.477        |
| $[\text{V}(\text{L}^2)_2]^+$ | —     | 0.696    | 0.474        |
| $[\text{V}(\text{L}^3)_2]^+$ | —     | 0.687    | 0.476        |

**Table S9.** Changes of Gibbs Free Energy (kcal/mol) for the Substitution Reactions of  $\text{HVO}_4^{2-}$  and Ligands in Aqueous Solution by the B3LYP Method.

| Reactions                                                                                                           | $\Delta G_{\text{sol}}$ |              |              |
|---------------------------------------------------------------------------------------------------------------------|-------------------------|--------------|--------------|
|                                                                                                                     | $\text{L}^1$            | $\text{L}^2$ | $\text{L}^3$ |
| $\text{HVO}_4^{2-} + \text{H}_2\text{L}^x \rightarrow [\text{VO}_2\text{L}^x]^- + \text{H}_2\text{O} + \text{OH}^-$ | 45.0                    | 44.9         | 58.2         |
| $[\text{VO}_2\text{L}^x]^- + \text{H}_2\text{L}^x \rightarrow [\text{V}(\text{L}^x)_2]^+ + 2\text{OH}^-$            | 140.2                   | 132.2        | 179.6        |

**Table S10.** Changes of Gibbs Free Energy (kcal/mol) for the Substitution Reactions of  $\text{H}_2\text{VO}_4^-$  and  $\text{L}^2$  in Aqueous Solution by the B3LYP Method.

| Reactions                                                                                                                                              | $\Delta G_{\text{sol}}$ |
|--------------------------------------------------------------------------------------------------------------------------------------------------------|-------------------------|
| $2\text{H}_2\text{VO}_4^- + \text{H}_2\text{L}^2 \rightarrow [(\text{VO}_2)_2\text{L}^2\text{H}_2\text{O}]_2 + 2\text{OH}^-$                           | 141.9                   |
| $[(\text{VO}_2)_2\text{L}^2\text{H}_2\text{O}]_2 + 14\text{H}_2\text{O} \rightarrow [\text{V}_2\text{L}^2\text{H}_2\text{O}]_{12}^{8+} + 8\text{OH}^-$ | 799.1                   |

Cartesian coordinates of the optimized uranyl complexes:

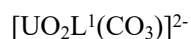

|   |             |             |             |
|---|-------------|-------------|-------------|
| C | 2.56118500  | 3.45134100  | -0.00014200 |
| C | 3.78824700  | 2.83466400  | -0.00164300 |
| C | 3.85562600  | 1.42212000  | -0.00169100 |
| C | 2.62257400  | 0.72194600  | -0.00018700 |
| C | 1.38790300  | 2.66048300  | 0.00124200  |
| C | 5.08169500  | 0.68202300  | -0.00321400 |
| C | 2.62273100  | -0.72152400 | -0.00018100 |
| C | 3.85591400  | -1.42144500 | -0.00176600 |
| C | 5.08183500  | -0.68110200 | -0.00326000 |
| C | 3.78883500  | -2.83401200 | -0.00181600 |
| H | 4.71036200  | -3.41147100 | -0.00301700 |
| C | 2.56191000  | -3.45094300 | -0.00032400 |
| C | 1.38846400  | -2.66031000 | 0.00126600  |
| H | 6.01855700  | 1.23254500  | -0.00434400 |
| H | 2.42857700  | 4.52550600  | 0.00005800  |
| H | 4.70963900  | 3.41233700  | -0.00275600 |
| H | 6.01881000  | -1.23143200 | -0.00443100 |
| H | 2.42946400  | -4.52512800 | -0.00026200 |
| N | 1.42663300  | -1.34078500 | 0.00135900  |
| N | 1.42635600  | 1.34095700  | 0.00122000  |
| C | -0.00233800 | -3.31703400 | 0.00303900  |
| C | -0.00305600 | 3.31693300  | 0.00296600  |
| O | -0.01660100 | -4.55653900 | 0.00297800  |
| O | -0.01760200 | 4.55640100  | 0.00347500  |
| O | -0.95607100 | -2.49560800 | 0.00444300  |
| O | -0.95660700 | 2.49527900  | 0.00365700  |
| O | -1.16736000 | -0.00130000 | -1.78671600 |
| O | -1.17362200 | 0.00087500  | 1.78829600  |
| O | -3.35656300 | -1.08547100 | -0.00142200 |
| C | -4.12206600 | 0.00014000  | -0.00512500 |
| O | -5.34887200 | 0.00010300  | -0.00723200 |
| O | -3.35650200 | 1.08542800  | -0.00606000 |
| U | -1.32939900 | -0.00018000 | 0.00054800  |

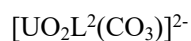

|   |             |             |             |
|---|-------------|-------------|-------------|
| C | -2.81468700 | 3.48027600  | 0.10190300  |
| C | -4.06403500 | 2.88663600  | 0.19404500  |
| C | -4.15752900 | 1.49755000  | 0.15830100  |
| C | -2.98378600 | 0.74454600  | 0.02908900  |
| C | -1.68952700 | 2.65552400  | -0.00864500 |
| C | -2.98365200 | -0.74466100 | -0.03062600 |
| C | -4.15713700 | -1.49768200 | -0.16205600 |
| C | -4.06356200 | -2.88676600 | -0.19757000 |
| H | -4.96120900 | -3.49038200 | -0.30167700 |
| C | -2.81436700 | -3.48035800 | -0.10296400 |
| C | -1.68941200 | -2.65557300 | 0.00965500  |
| H | -2.65306200 | 4.55012200  | 0.11597100  |
| H | -4.96192100 | 3.49020000  | 0.29638900  |
| H | -2.65272500 | -4.55019600 | -0.11661000 |
| N | -1.77960900 | -1.32753800 | 0.04144800  |
| N | -1.77964100 | 1.32748900  | -0.04071300 |
| C | -0.28139700 | -3.27002800 | 0.10476700  |
| C | -0.28124000 | 3.26988800  | -0.10117800 |
| O | -0.22740200 | -4.50662500 | 0.12757700  |
| O | -0.22708800 | 4.50651800  | -0.12295000 |
| O | 0.65178400  | -2.42381300 | 0.15126900  |
| O | 0.65181700  | 2.42359300  | -0.14675600 |
| O | 0.98281900  | 0.11794500  | 1.78461400  |
| O | 0.98057000  | -0.11736800 | -1.78355800 |
| O | 3.16135900  | -1.08406700 | 0.07346800  |
| C | 3.92604000  | -0.00010000 | -0.00291400 |
| O | 5.15300700  | -0.00025100 | -0.00481600 |
| O | 3.16137900  | 1.08400300  | -0.07698600 |
| U | 1.13487500  | 0.00006200  | 0.00044200  |
| H | -5.12281600 | 1.01433900  | 0.24392700  |
| H | -5.12222600 | -1.01441800 | -0.24958100 |

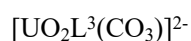

|   |            |            |             |
|---|------------|------------|-------------|
| C | 1.48023300 | 2.73280900 | -0.00006400 |
| C | 2.74366400 | 3.35122500 | 0.00002700  |
| C | 3.92159800 | 2.59037800 | 0.00022700  |
| C | 3.79736700 | 1.20163300 | 0.00029900  |

|   |             |             |             |
|---|-------------|-------------|-------------|
| C | 2.49196800  | 0.71616600  | 0.00022300  |
| H | 2.75760800  | 4.43423400  | -0.00009700 |
| H | 4.89105900  | 3.08320100  | 0.00027400  |
| C | 3.79719600  | -1.20212700 | 0.00041200  |
| C | 3.92121600  | -2.59089500 | 0.00022100  |
| C | 2.74316100  | -3.35156100 | -0.00001200 |
| C | 1.47982700  | -2.73296100 | -0.00012300 |
| C | 2.49186400  | -0.71647100 | 0.00028000  |
| H | 4.89059500  | -3.08388000 | 0.00026700  |
| H | 2.75695100  | -4.43457300 | -0.00014600 |
| N | 1.36690400  | -1.40536800 | 0.00002200  |
| N | 1.36711200  | 1.40523700  | 0.00005100  |
| C | 0.13108300  | -3.47852900 | -0.00044700 |
| C | 0.13169800  | 3.47860900  | -0.00042300 |
| O | 0.19045800  | -4.71861600 | -0.00056800 |
| O | 0.19130400  | 4.71869300  | -0.00083100 |
| O | -0.85815600 | -2.69997100 | -0.00054700 |
| O | -0.85777500 | 2.70029100  | -0.00027200 |
| O | -0.99390300 | -0.00023500 | 1.78502900  |
| O | -0.99451000 | 0.00030800  | -1.78521900 |
| O | -3.17127800 | 1.08515500  | 0.00092800  |
| C | -3.93875700 | 0.00017600  | 0.00061800  |
| O | -5.16418900 | 0.00030100  | 0.00102200  |
| O | -3.17145900 | -1.08488600 | -0.00021100 |
| U | -1.15523100 | 0.00005900  | -0.00007300 |
| C | 4.75290700  | -0.00030900 | 0.00046400  |
| H | 5.40648800  | -0.00039100 | -0.88037800 |
| H | 5.40632200  | -0.00032300 | 0.88142700  |

[UO<sub>2</sub>L<sup>1</sup>(OH)]<sup>-</sup>

|   |             |             |             |
|---|-------------|-------------|-------------|
| C | -2.01834300 | 3.45060000  | -0.00795700 |
| C | -3.25002200 | 2.83821500  | -0.00751500 |
| C | -3.32965900 | 1.42593400  | -0.00664600 |
| C | -2.10568100 | 0.71931800  | -0.00552600 |
| C | -0.85150400 | 2.65656100  | -0.00632900 |
| C | -4.55568000 | 0.68276800  | -0.00722600 |
| C | -2.10605500 | -0.71840600 | -0.00570600 |
| C | -3.33040800 | -1.42441700 | -0.00681000 |
| C | -4.55604700 | -0.68062400 | -0.00729000 |
| C | -3.25147600 | -2.83671300 | -0.00773700 |
| H | -4.16606500 | -3.42223200 | -0.00832700 |
| C | -2.02007700 | -3.44972100 | -0.00813500 |

|   |             |             |             |
|---|-------------|-------------|-------------|
| C | -0.85287900 | -2.65626200 | -0.00673900 |
| H | -5.49267500 | 1.23036500  | -0.00768200 |
| H | -1.88948000 | 4.52497500  | -0.00963100 |
| H | -4.16432500 | 3.42417400  | -0.00809600 |
| H | -5.49333000 | -1.22772200 | -0.00775600 |
| H | -1.89181500 | -4.52416700 | -0.00951800 |
| N | -0.90634100 | -1.33478500 | -0.00537500 |
| N | -0.90564000 | 1.33512000  | -0.00486000 |
| C | 0.54916800  | -3.27920600 | -0.00838700 |
| C | 0.55083400  | 3.27891300  | -0.00844300 |
| O | 0.62387300  | -4.50445700 | -0.01929400 |
| O | 0.62590300  | 4.50417100  | -0.01963100 |
| O | 1.48583200  | -2.41339900 | -0.00110400 |
| O | 1.48720800  | 2.41287700  | 0.00130900  |
| O | 1.33594500  | -0.00217500 | 1.80184500  |
| O | 1.39358600  | 0.00152900  | -1.77341200 |
| U | 1.45633700  | -0.00035700 | 0.01714500  |
| O | 3.61090000  | -0.00076900 | 0.00895700  |
| H | 4.05957600  | 0.00114000  | -0.84132400 |

[UO<sub>2</sub>L<sup>2</sup>(OH)]<sup>-</sup>

|   |             |             |             |
|---|-------------|-------------|-------------|
| C | 3.48646400  | 2.20570500  | -0.01047500 |
| C | 2.89511200  | 3.45955000  | -0.00917300 |
| C | 1.50667100  | 3.55557800  | -0.00766200 |
| C | 0.74307800  | 2.38456700  | -0.00696100 |
| C | 2.66185800  | 1.08015100  | -0.00883400 |
| C | -0.74317500 | 2.38455600  | -0.00705400 |
| C | -1.50681100 | 3.55552100  | -0.00848600 |
| C | -2.89525800 | 3.45943300  | -0.00998100 |
| H | -3.50149500 | 4.35931300  | -0.01088600 |
| C | -3.48656400 | 2.20557600  | -0.01065900 |
| C | -2.66191400 | 1.08005000  | -0.00853100 |
| H | 4.55650300  | 2.04699700  | -0.01267500 |
| H | 3.50132000  | 4.35944900  | -0.00950300 |
| H | -4.55659900 | 2.04685400  | -0.01282400 |
| N | -1.32885400 | 1.17414000  | -0.00655200 |
| N | 1.32878800  | 1.17419500  | -0.00691000 |
| C | -3.26418500 | -0.33122600 | -0.01001500 |
| C | 3.26418500  | -0.33108000 | -0.01047700 |
| O | -4.48784400 | -0.42329100 | -0.02287800 |
| O | 4.48783100  | -0.42314600 | -0.02304400 |
| O | -2.39084400 | -1.25988600 | 0.00109100  |

|   |             |             |             |
|---|-------------|-------------|-------------|
| O | 2.39083200  | -1.25977900 | 0.00011100  |
| O | 0.00034000  | -1.08222300 | 1.80365500  |
| O | -0.00028800 | -1.14460400 | -1.77376900 |
| U | 0.00003200  | -1.20756400 | 0.01804500  |
| H | 1.03171700  | 4.52729300  | -0.00696600 |
| H | -1.03192100 | 4.52726800  | -0.00854600 |
| O | 0.00012000  | -3.36309100 | 0.01269500  |
| H | 0.00007900  | -3.81172500 | -0.83754200 |

[UO<sub>2</sub>L<sup>3</sup>(OH)]<sup>-</sup>

|   |             |             |             |
|---|-------------|-------------|-------------|
| C | -2.70086500 | 1.02010000  | -0.00312600 |
| C | -3.34199500 | 2.27141200  | -0.01194000 |
| C | -2.60165500 | 3.46856700  | -0.01383700 |
| C | -1.20649900 | 3.38354200  | -0.00673000 |
| C | -0.70849400 | 2.08958300  | 0.00338000  |
| H | -4.42481800 | 2.28090000  | -0.01880700 |
| H | -3.12271700 | 4.42128100  | -0.02207300 |
| C | 1.21508600  | 3.38049500  | -0.00678500 |
| C | 2.61045000  | 3.46199300  | -0.01390900 |
| C | 3.34776900  | 2.26297200  | -0.01197800 |
| C | 2.70347900  | 1.01328800  | -0.00312800 |
| C | 0.71381300  | 2.08779300  | 0.00334400  |
| H | 3.13392600  | 4.41338200  | -0.02216000 |
| H | 4.43061200  | 2.26974900  | -0.01882200 |
| N | 1.37550100  | 0.94915600  | 0.00523900  |
| N | -1.37306100 | 0.95261500  | 0.00526800  |
| C | 3.35927700  | -0.38006400 | -0.00742700 |
| C | -3.36016600 | -0.37160800 | -0.00745600 |
| O | 4.58473000  | -0.44196800 | -0.01966300 |
| O | -4.58577400 | -0.43040400 | -0.01974600 |
| O | 2.49228300  | -1.32128100 | -0.00004000 |
| O | -2.49556900 | -1.31503000 | -0.00003700 |
| O | -0.00165700 | -1.25225700 | 1.79942400  |
| O | -0.00165800 | -1.28447800 | -1.76963300 |
| U | -0.00172300 | -1.35319500 | 0.01705700  |
| C | 0.00550200  | 4.34087800  | -0.01139400 |
| H | 0.00629000  | 4.98826100  | -0.89495500 |
| H | 0.00636000  | 4.99699800  | 0.86572900  |
| O | -0.00451600 | -3.50522700 | -0.00665300 |
| H | -0.00513600 | -3.95756100 | -0.85501700 |

[VO<sub>2</sub>L<sup>1</sup>]

|   |             |             |             |
|---|-------------|-------------|-------------|
| V | -0.11314900 | -1.69875700 | 0.10025700  |
| O | 0.27848600  | -2.23463200 | 1.54638000  |
| O | 3.54248600  | -1.85337800 | 0.85213000  |
| O | 4.01455000  | -1.06569300 | -1.23324600 |
| O | -2.00024500 | -2.38377800 | -0.09287600 |
| O | -4.22505900 | -1.97901300 | -0.19435900 |
| N | 1.21354700  | 0.11896800  | 0.04355300  |
| N | -1.39133100 | 0.03210600  | -0.04365300 |
| C | -2.69497000 | -0.16014100 | -0.09453700 |
| C | -0.86668400 | 1.26578100  | -0.00067100 |
| C | 0.55491100  | 1.31748600  | 0.04362300  |
| C | 1.17183100  | 2.57884500  | 0.07797200  |
| C | 2.59203600  | 2.58195400  | 0.08719900  |
| H | 3.13205800  | 3.52335000  | 0.11575100  |
| C | 3.25056300  | 1.38816400  | 0.02560600  |
| H | 4.32986500  | 1.33985300  | -0.03034300 |
| C | 2.55244600  | 0.13916100  | 0.01171400  |
| C | -3.05607100 | -1.63981900 | -0.13175400 |
| C | 3.44795000  | -1.10585900 | -0.12012600 |
| C | 0.35056100  | 3.75126500  | 0.08338400  |
| H | 0.84572000  | 4.71671300  | 0.11467400  |
| C | -1.01633200 | 3.68984400  | 0.04391600  |
| H | -1.60987300 | 4.59744800  | 0.04571200  |
| C | -1.67595000 | 2.42344600  | -0.00398500 |
| C | -3.07514100 | 2.20879100  | -0.05883300 |
| H | -3.74205200 | 3.06545600  | -0.06444800 |
| C | -3.58715900 | 0.92651300  | -0.10628400 |
| H | -4.64862700 | 0.72050300  | -0.15027300 |
| O | 0.62126700  | -2.50125900 | -1.06298300 |

[VO<sub>2</sub>L<sup>2</sup>]

|   |             |            |             |
|---|-------------|------------|-------------|
| C | 3.46583500  | 1.48226300 | -0.00700600 |
| C | 2.91458300  | 2.75388200 | -0.01080800 |
| C | 1.52792500  | 2.89144400 | -0.00807500 |
| C | 0.73733900  | 1.74264300 | -0.00280600 |
| C | 2.60784000  | 0.38220000 | -0.00137500 |
| C | -0.73744800 | 1.74266000 | 0.00134900  |
| C | -1.52811900 | 2.89140200 | 0.00686100  |
| C | -2.91476700 | 2.75377200 | 0.01089300  |
| H | -3.54791600 | 3.63489800 | 0.01563100  |

|   |             |             |             |
|---|-------------|-------------|-------------|
| C | -3.46597400 | 1.48212800  | 0.00821500  |
| C | -2.60790700 | 0.38213800  | 0.00179900  |
| H | 4.52972600  | 1.28554900  | -0.00755100 |
| H | 3.54770700  | 3.63502900  | -0.01529100 |
| H | -4.52985200 | 1.28534500  | 0.01019300  |
| N | -1.28071400 | 0.51306900  | -0.00033000 |
| N | 1.28062300  | 0.51306100  | -0.00069500 |
| C | -3.12205400 | -1.05385900 | -0.00715500 |
| C | 3.12220800  | -1.05378700 | 0.00818900  |
| O | -4.34384300 | -1.21650100 | -0.00391900 |
| O | 4.34406100  | -1.21612900 | 0.00792400  |
| O | -2.18296800 | -1.89871200 | -0.01958900 |
| O | 2.18323500  | -1.89871900 | 0.01693900  |
| H | 1.07402100  | 3.87358600  | -0.01025800 |
| H | -1.07426500 | 3.87357200  | 0.00840400  |
| V | -0.00007900 | -1.52377900 | -0.00055700 |
| O | 0.01057300  | -2.39310400 | -1.33395400 |
| O | -0.01027300 | -2.38999700 | 1.33489700  |

[VO<sub>2</sub>L<sup>3</sup>]-

|   |             |             |             |
|---|-------------|-------------|-------------|
| C | -2.73208200 | 0.09324100  | -0.00016800 |
| C | -3.39446200 | 1.34808600  | -0.00047300 |
| C | -2.72064800 | 2.56715400  | -0.00012600 |
| C | -1.32612100 | 2.51303100  | 0.00026300  |
| C | -0.78628300 | 1.23417900  | 0.00025700  |
| H | -4.47482700 | 1.27762300  | -0.00105000 |
| H | -3.26933300 | 3.50438000  | -0.00026900 |
| C | 1.07338500  | 2.65291200  | 0.00033300  |
| C | 2.45460600  | 2.82176300  | 0.00016400  |
| C | 3.27750200  | 1.67426100  | -0.00012500 |
| C | 2.70930000  | 0.40090200  | -0.00023400 |
| C | 0.63133200  | 1.33451200  | 0.00028500  |
| H | 2.91169800  | 3.80636900  | 0.00015300  |
| H | 4.35696800  | 1.75413400  | -0.00032100 |
| N | 1.38169000  | 0.25639500  | 0.00003600  |
| N | -1.38783900 | 0.04253500  | 0.00010800  |
| C | 3.39380200  | -0.96262700 | -0.00096500 |
| C | -3.60941400 | -1.21098700 | -0.00011900 |
| O | 4.60838100  | -1.04460000 | -0.00118600 |
| O | -4.83443200 | -0.95984100 | -0.00287800 |
| O | 2.52112000  | -1.92191900 | -0.00127700 |
| O | -2.97115300 | -2.26731400 | 0.00274400  |



|   |             |             |             |
|---|-------------|-------------|-------------|
| C | -0.18021000 | 3.53715500  | 0.00042800  |
| H | -0.21405600 | 4.18818900  | -0.87998500 |
| H | -0.21405600 | 4.18793800  | 0.88103300  |
| V | 0.50697900  | -1.70841000 | 0.00015700  |
| O | 0.12084500  | -2.50063600 | -1.32055200 |
| O | 0.12297500  | -2.49809200 | 1.32298600  |

[V(L<sup>1</sup>)<sub>2</sub>]<sup>+</sup>

|   |             |             |             |
|---|-------------|-------------|-------------|
| C | 2.77244700  | -2.68592500 | 2.10312800  |
| C | 4.04112900  | -2.24649300 | 1.75901000  |
| C | 4.19243200  | -1.13741300 | 0.89058500  |
| C | 3.00245900  | -0.55434700 | 0.43410000  |
| C | 1.65052900  | -2.01808500 | 1.58019300  |
| C | 5.41695700  | -0.53919600 | 0.42211200  |
| C | 3.00248500  | 0.55438600  | -0.43402700 |
| C | 4.19248500  | 1.13733800  | -0.89059200 |
| C | 5.41698400  | 0.53901300  | -0.42218400 |
| C | 4.04122900  | 2.24641500  | -1.75902100 |
| H | 4.91596400  | 2.75038400  | -2.15374500 |
| C | 2.77256300  | 2.68595000  | -2.10307400 |
| C | 1.65061900  | 2.01819000  | -1.58009000 |
| H | 6.35943600  | -0.96025300 | 0.75176200  |
| H | 2.61624600  | -3.52931100 | 2.76355600  |
| H | 4.91584100  | -2.75053200 | 2.15369100  |
| H | 6.35948500  | 0.95998100  | -0.75188200 |
| H | 2.61640400  | 3.52936100  | -2.76347700 |
| N | 1.78591700  | 0.99004100  | -0.77503600 |
| N | 1.78587400  | -0.98993000 | 0.77515100  |
| C | 0.19706400  | 2.31655400  | -1.81359500 |
| C | 0.19692700  | -2.31628800 | 1.81381400  |
| O | -0.22394000 | 3.19943500  | -2.50492400 |
| O | -0.22407400 | -3.19905100 | 2.50530500  |
| O | -0.56808200 | 1.44937200  | -1.13452100 |
| O | -0.56821900 | -1.44922600 | 1.13465300  |
| V | -0.00002200 | 0.00006500  | 0.00006200  |
| C | -2.77229800 | -2.10324600 | -2.68598000 |
| C | -4.04100400 | -1.75919400 | -2.24656500 |
| C | -4.19237700 | -0.89071100 | -1.13753700 |
| C | -3.00244300 | -0.43410700 | -0.55450000 |
| C | -1.65041600 | -1.58020000 | -2.01815900 |
| C | -5.41693200 | -0.42230000 | -0.53933000 |
| C | -3.00252400 | 0.43403700  | 0.55423200  |

|   |             |             |             |
|---|-------------|-------------|-------------|
| C | -4.19255300 | 0.89053900  | 1.13717400  |
| C | -5.41701500 | 0.42203600  | 0.53885200  |
| C | -4.04134800 | 1.75898000  | 2.24624900  |
| H | -4.91610500 | 2.15365600  | 2.75021600  |
| C | -2.77270000 | 2.10308900  | 2.68580600  |
| C | -1.65072400 | 1.58012700  | 2.01808700  |
| H | -6.35939100 | -0.75202000 | -0.96037800 |
| H | -2.61604100 | -2.76369000 | -3.52934200 |
| H | -4.91569000 | -2.15394900 | -2.75059300 |
| H | -6.35953800 | 0.75168800  | 0.95981000  |
| H | -2.61658100 | 2.76349700  | 3.52922100  |
| N | -1.78597400 | 0.77508500  | 0.98992100  |
| N | -1.78582800 | -0.77510500 | -0.99005600 |
| C | -0.19717400 | 1.81370300  | 2.31648500  |
| C | -0.19679000 | -1.81368800 | -2.31633600 |
| O | 0.22381500  | 2.50503600  | 3.19935700  |
| O | 0.22426100  | -2.50509300 | -3.19916000 |
| O | 0.56809200  | 1.13457400  | 1.44936700  |
| O | 0.56821000  | -1.13453700 | -1.44922500 |

$[V(L^2)_2]^+$

|   |             |             |             |
|---|-------------|-------------|-------------|
| C | -2.67672100 | -2.54271800 | 2.35749500  |
| C | -3.97004300 | -2.16633500 | 2.00859900  |
| C | -4.16339300 | -1.15440500 | 1.07037000  |
| C | -3.05183700 | -0.53726600 | 0.49811100  |
| C | -1.62285100 | -1.87920600 | 1.74215700  |
| C | -3.05196300 | 0.53705900  | -0.49777500 |
| C | -4.16367200 | 1.15413600  | -1.06980900 |
| C | -3.97057000 | 2.16597300  | -2.00819400 |
| H | -4.82479700 | 2.65422900  | -2.46082800 |
| C | -2.67732800 | 2.54231400  | -2.35746000 |
| C | -1.62331700 | 1.87890700  | -1.74225300 |
| H | -2.46365000 | -3.32083600 | 3.07900500  |
| H | -4.82416200 | -2.65462700 | 2.46140000  |
| H | -2.46446100 | 3.32031400  | -3.07915600 |
| N | -1.81590200 | 0.91767400  | -0.85067000 |
| N | -1.81568100 | -0.91785000 | 0.85071700  |
| C | -0.16960800 | 2.14089600  | -1.98571300 |
| C | -0.16905800 | -2.14124800 | 1.98512100  |
| O | 0.26279000  | 2.95955500  | -2.74598900 |
| O | 0.26346400  | -2.96052800 | 2.74472700  |
| O | 0.58482000  | 1.33164400  | -1.23429700 |

|   |             |             |             |
|---|-------------|-------------|-------------|
| O | 0.58515100  | -1.33144500 | 1.23427800  |
| H | -5.16303500 | -0.85100200 | 0.78914800  |
| H | -5.16323000 | 0.85073700  | -0.78828900 |
| V | -0.00000600 | 0.00013900  | -0.00005100 |
| C | 2.67689400  | 2.35783100  | 2.54237300  |
| C | 3.97018900  | 2.00886400  | 2.16597600  |
| C | 4.16347100  | 1.07049700  | 1.15415100  |
| C | 3.05188000  | 0.49823100  | 0.53710000  |
| C | 1.62297900  | 1.74246600  | 1.87894300  |
| C | 3.05193300  | -0.49775500 | -0.53712600 |
| C | 4.16360100  | -1.07001500 | -1.15407600 |
| C | 3.97042200  | -2.00850700 | -2.16579200 |
| H | 4.82461800  | -2.46134400 | -2.65391500 |
| C | 2.67715800  | -2.35763900 | -2.54218500 |
| C | 1.62318700  | -1.74224000 | -1.87888900 |
| H | 2.46387500  | 3.07938600  | 3.32046100  |
| H | 4.82434700  | 2.46169100  | 2.65417600  |
| H | 2.46424300  | -3.07936100 | -3.32014600 |
| N | 1.81585300  | -0.85060000 | -0.91770100 |
| N | 1.81573800  | 0.85098100  | 0.91762800  |
| C | 0.16945800  | -1.98538600 | -2.14098200 |
| C | 0.16921400  | 1.98550000  | 2.14106300  |
| O | -0.26306600 | -2.74535400 | -2.95988300 |
| O | -0.26325200 | 2.74536300  | 2.96012000  |
| O | -0.58484300 | -1.23409600 | -1.33151900 |
| O | -0.58507400 | 1.23434400  | 1.33158500  |
| H | 5.16309400  | 0.78922000  | 0.85073600  |
| H | 5.16318600  | -0.78861700 | -0.85065000 |

[V(L<sup>2</sup>)<sub>2</sub>]<sup>+</sup>

|   |             |             |             |
|---|-------------|-------------|-------------|
| C | -2.01643300 | -1.85590200 | -1.68980300 |
| C | -3.29589500 | -2.10496200 | -2.20877400 |
| C | -4.44510300 | -1.52001900 | -1.62236200 |
| C | -4.28618700 | -0.71572200 | -0.48530000 |
| C | -2.98072300 | -0.63994100 | -0.04818500 |
| H | -3.38842000 | -2.70935800 | -3.10241500 |
| H | -5.40779000 | -1.67444000 | -2.09587400 |
| C | -3.97248500 | 1.00841500  | 1.22238500  |
| C | -3.77658400 | 2.15096600  | 2.01172300  |
| C | -2.45469700 | 2.51454700  | 2.36473700  |
| C | -1.35404900 | 1.77434200  | 1.90346200  |
| C | -2.80191800 | 0.34347300  | 0.92654300  |

|   |             |             |             |
|---|-------------|-------------|-------------|
| H | -4.59460400 | 2.78993400  | 2.32367700  |
| H | -2.27384200 | 3.40577600  | 2.95257200  |
| N | -1.56548100 | 0.68620800  | 1.18743300  |
| N | -1.89420700 | -1.12078100 | -0.59954100 |
| C | 0.13679000  | 2.01728400  | 1.95256300  |
| C | -0.62712900 | -2.17243600 | -2.19075500 |
| O | 0.68370100  | 2.88591700  | 2.56989700  |
| O | -0.35514000 | -2.87074300 | -3.12168000 |
| O | 0.77342900  | 1.11472100  | 1.18199400  |
| O | 0.28743300  | -1.52830100 | -1.42870900 |
| C | -5.08288600 | 0.30382700  | 0.38481900  |
| H | -5.61882700 | 1.02158200  | -0.24178600 |
| H | -5.82510800 | -0.18986200 | 1.01906400  |
| V | 0.00002000  | -0.26531000 | -0.00016600 |
| C | 1.35396700  | 1.77885000  | -1.89925900 |
| C | 2.45461400  | 2.52007700  | -2.35894100 |
| C | 3.77649800  | 2.15574800  | -2.00674300 |
| C | 3.97243800  | 1.01143700  | -1.21994100 |
| C | 2.80188400  | 0.34587700  | -0.92551700 |
| H | 2.27374700  | 3.41253800  | -2.94490200 |
| H | 4.59451200  | 2.79537100  | -2.31737200 |
| C | 4.28621900  | -0.71673400 | 0.48368500  |
| C | 4.44518400  | -1.52383600 | 1.61873800  |
| C | 3.29599300  | -2.11023500 | 2.20375400  |
| C | 2.01652400  | -1.86000300 | 1.68537200  |
| C | 2.98072700  | -0.63987100 | 0.04683500  |
| H | 5.40788500  | -1.67941500 | 2.09184400  |
| H | 3.38857600  | -2.71684800 | 3.09588400  |
| N | 1.89422800  | -1.12214900 | 0.59694900  |
| N | 1.56543900  | 0.68917400  | -1.18561800 |
| C | 0.62727700  | -2.17781400 | 2.18562200  |
| C | -0.13693500 | 2.02163100  | -1.94795400 |
| O | 0.35527800  | -2.87847100 | 3.11474900  |
| O | -0.68390100 | 2.89141700  | -2.56364600 |
| O | -0.28739300 | -1.53165300 | 1.42523000  |
| O | -0.77343200 | 1.11743200  | -1.17932400 |
| C | 5.08288200  | 0.30487100  | -0.38408000 |
| H | 5.82512800  | -0.18729400 | -1.01947000 |
| H | 5.61878800  | 1.02117700  | 0.24421700  |

[(VO<sub>2</sub>)<sub>2</sub>L<sup>2</sup>(H<sub>2</sub>O)<sub>2</sub>]

|   |             |            |             |
|---|-------------|------------|-------------|
| C | -2.56581500 | 2.35719900 | -0.03474000 |
| C | -1.24928000 | 2.81105400 | -0.04380300 |

|   |             |             |             |
|---|-------------|-------------|-------------|
| C | -0.21619800 | 1.88530400  | -0.04195900 |
| C | -0.53585200 | 0.51766700  | -0.03227600 |
| C | -2.77971600 | 0.97856900  | -0.02462200 |
| C | 0.53587100  | -0.51760600 | -0.03227300 |
| C | 0.21622100  | -1.88524200 | -0.04184400 |
| C | 1.24930700  | -2.81098900 | -0.04374700 |
| H | 1.03357700  | -3.87288100 | -0.05293000 |
| C | 2.56584200  | -2.35713200 | -0.03486800 |
| C | 2.77974100  | -0.97850000 | -0.02486700 |
| H | -3.40870700 | 3.03480800  | -0.03744000 |
| H | -1.03354800 | 3.87294500  | -0.05307800 |
| H | 3.40873400  | -3.03474000 | -0.03763300 |
| N | 1.79507000  | -0.07838600 | -0.02421300 |
| N | -1.79504900 | 0.07845000  | -0.02402900 |
| C | 4.16975000  | -0.44524700 | -0.01504000 |
| C | -4.16973300 | 0.44534600  | -0.01459500 |
| O | 5.17661600  | -1.23037200 | 0.00609300  |
| O | -5.17658200 | 1.23043700  | 0.00655900  |
| O | 4.41111200  | 0.80046600  | -0.02959100 |
| O | -4.41107200 | -0.80041000 | -0.02900600 |
| H | 0.82395700  | 2.18197300  | -0.04856400 |
| H | -0.82393200 | -2.18191800 | -0.04832500 |
| V | 6.40537900  | 0.51437900  | -0.01002400 |
| O | 6.93806600  | 1.25126700  | 1.29512500  |
| O | 6.95156800  | 1.23602000  | -1.30878600 |
| O | 7.78763800  | -1.07801500 | 0.11037100  |
| H | 7.31641800  | -1.88840200 | 0.34756000  |
| H | 8.48399700  | -0.92326500 | 0.76016900  |
| V | -6.40527200 | -0.51442400 | -0.01000200 |
| O | -6.95083500 | -1.23552600 | -1.30931200 |
| O | -6.93896100 | -1.25162300 | 1.29459200  |
| O | -7.78790600 | 1.07768300  | 0.11002800  |
| H | -8.48404200 | 0.92202600  | 0.75986600  |
| H | -7.31704000 | 1.88807200  | 0.34790700  |

[V<sub>2</sub>L<sup>2</sup>(H<sub>2</sub>O)<sub>12</sub>]<sup>8+</sup>

|   |             |             |             |
|---|-------------|-------------|-------------|
| C | 2.62315700  | -2.30714000 | -0.02134900 |
| C | 1.32229200  | -2.80853200 | -0.01501200 |
| C | 0.27668500  | -1.89889900 | -0.00890500 |
| C | 0.56244200  | -0.46484600 | -0.01003600 |
| C | 2.85410300  | -0.85427500 | -0.01545200 |
| C | -0.51736400 | 0.47617200  | -0.01540600 |

|   |             |             |             |
|---|-------------|-------------|-------------|
| C | -0.23546100 | 1.90809900  | -0.02414300 |
| C | -1.28482400 | 2.81417300  | -0.03727400 |
| H | -1.10727200 | 3.88757700  | -0.04772000 |
| C | -2.58444000 | 2.30974300  | -0.03943000 |
| C | -2.81152400 | 0.85866100  | -0.02312900 |
| H | 3.46845500  | -2.99153600 | -0.02729300 |
| H | 1.14159900  | -3.88148400 | -0.01601600 |
| H | -3.43030400 | 2.99323400  | -0.05629800 |
| N | -1.83603700 | -0.00652100 | -0.01434000 |
| N | 1.87994700  | 0.01444900  | -0.00947500 |
| C | -4.30437500 | 0.40185100  | -0.01578200 |
| C | 4.34510500  | -0.41959900 | -0.01162400 |
| O | -5.23347500 | 1.27340700  | 0.07021300  |
| O | 5.26014000  | -1.29718400 | -0.06312900 |
| O | -4.73237800 | -0.77902600 | -0.10492900 |
| O | 4.80689100  | 0.76378100  | 0.04137400  |
| H | -0.75659300 | -2.22851000 | -0.00592700 |
| H | 0.79649000  | 2.24179000  | -0.02131300 |
| V | -6.85787700 | -0.13571200 | -0.00383000 |
| V | 6.83479200  | 0.13976400  | 0.00204600  |
| O | 6.71549600  | 1.50894900  | 1.58327200  |
| O | 7.14912400  | 2.03831400  | -0.85923600 |
| O | 6.50429400  | 0.02052800  | -2.07409700 |
| O | 8.87988900  | 0.47812700  | 0.28515100  |
| O | 7.15114800  | -0.94492900 | 1.75964800  |
| O | 7.73481100  | -1.63133800 | -0.64977300 |
| H | 7.01283000  | -0.61152500 | 2.66663000  |
| H | 7.47718000  | 1.92267800  | 2.03874300  |
| H | 5.89253700  | 1.93224100  | 1.89169700  |
| H | 7.52091200  | 2.22229900  | -1.74451800 |
| H | 7.05376600  | 2.88962800  | -0.39128600 |
| H | 9.44773200  | 0.05355700  | 0.96137900  |
| H | 9.43906900  | 1.12305500  | -0.19520800 |
| H | 8.69345100  | -1.74339100 | -0.81810100 |
| H | 7.28456400  | -2.48532600 | -0.80184500 |
| H | 6.92854100  | -0.64042300 | -2.65446900 |
| H | 5.99198600  | 0.63969600  | -2.62612100 |
| H | 7.42882500  | -1.88001800 | 1.81339900  |
| O | -6.18772000 | -0.05372000 | 1.98636700  |
| O | -6.85539700 | -2.16343000 | -0.00142600 |
| O | -8.63198300 | -0.52420900 | 1.29542700  |
| O | -8.59562500 | -0.53023400 | -1.13642200 |
| O | -7.71689700 | 1.70949800  | 0.01354100  |
| O | -6.33813800 | 0.07517400  | -1.99819000 |

|   |             |             |             |
|---|-------------|-------------|-------------|
| H | -6.09497300 | -2.72993400 | 0.23829300  |
| H | -8.87879600 | -1.38451700 | 1.69124100  |
| H | -9.07059000 | 0.16362300  | 1.83565900  |
| H | -7.28989200 | 2.54831500  | 0.28226600  |
| H | -8.60861500 | 1.92775600  | -0.33182600 |
| H | -6.36036900 | -0.78927900 | 2.60569000  |
| H | -6.23922600 | 0.76664400  | 2.51391100  |
| H | -6.03647000 | -0.64584600 | -2.58361400 |
| H | -6.51496500 | 0.86897500  | -2.54019900 |
| H | -8.69683400 | -0.55451900 | -2.10900000 |
| H | -9.47362400 | -0.67259600 | -0.72707700 |
| H | -7.55204300 | -2.73298000 | -0.39041300 |
